# Supplementary material for: Photodynamic activity of Sn(iv) tetrathien-2-ylchlorin against MCF-7 breast cancer cells
Source: Royal Society of Chemistry journal article supplement (doi:10.1039/d0dt03958f), 2021-01-01
Supplement: d0dt03958f1.pdf [file d0dt03958f1.pdf]

## Supporting information

for

### **Photodynamic activity of Sn(IV) tetrathien-2-ylchlorin against MCF-7 breast cancer cells**

Balaji Babu, John Mack\* and Tebello Nyokong\*

*Institute for Nanotechnology Innovation, Department of Chemistry, Rhodes University, Makhanda  
6140, South Africa. E-mail: j.mack@ru.ac.za, t.nyokong@ru.ac.za*

## Equipment

UV-visible absorption spectra were measured on a Shimadzu UV-2550 spectrophotometer, while a Varian Eclipse spectrofluorimeter was used to record the fluorescence emission spectra. Triplet state lifetimes were determined at 500 nm in N<sub>2</sub> saturated DMF solutions using an Edinburgh Instruments LP980 spectrometer with a pump beam of 430 nm provided by an Ekspla NT-342B laser fitted with an OPO. MS data were obtained on a Bruker® AutoFLEX III Smart-beam TOF/TOF mass spectrometer in positive ion mode by using  $\alpha$ -cyano-4-hydroxycinnamic acid as the matrix. <sup>1</sup>H and <sup>13</sup>C NMR spectra were measured with a Bruker Avance 400 (400 MHz) at room temperature with CDCl<sub>3</sub> as the solvent. Steady-state phosphorescence of <sup>1</sup>O<sub>2</sub> at *ca.* 1270 nm was measured on a Picoquant FluoTime 300 spectrometer equipped with a Near-IR PMT. For photobleaching studies, a solution of SnC in 1% DMF/H<sub>2</sub>O was irradiated for 30 min using a 660 nm Thorlabs M660L3 LED in the arrangement used for the *in vitro* cell studies, and absorption spectra were recorded at regular intervals.

## Cell studies

The *in vitro* anticancer activities of the Sn(IV) porphyrins were evaluated against MCF-7 cancer cells by MTT assay in the dark and under illumination.<sup>[S1]</sup> MCF-7 cell lines were grown in Dulbecco's modified Eagle's medium (DMEM), and were supplemented with 10% fetal bovine serum (FBS) and 0.01% antibiotics (penicillin and streptomycin-amphotericin B) in 75 cm<sup>2</sup> cell culture flasks incubated at 37 °C and 5% CO<sub>2</sub>. The cells were seeded ( $1 \times 10^4$ /well) in 96-well plates in DMEM medium. The cells were then incubated for 24 h at 37°C in the incubator under 5% CO<sub>2</sub>. The medium was replaced with DMEM media containing compounds at different concentrations (0.3–25  $\mu$ M), and the cells were incubated for 24 h in the dark. Control cells were given fresh DMEM medium. After 24 h, the original medium was removed, and fresh DMEM with no phenol red was added.

Cells were irradiated at 660 nm with a Thorlabs M660L3 LED mounted into the housing of a Modulight 7710-680 medical laser system (280 mW.cm<sup>-2</sup>) for 30 min. Fresh DMEM medium was added, and cells were incubated for a further 24 h in the dark. A separate set of cells treated with the compounds was prepared, and no light treatment was performed. After 24 h, the medium was removed, and the cells were incubated for 3 h with a 5 mg/mL MTT solution added to each well of the plate. The medium was discarded carefully after the incubation period, and the formazan crystals were solubilized in 200  $\mu$ L of DMSO. Absorbance was read

at 540 nm with a Molecular Devices Spectra Max M5 plate reader. An analysis of control cells with no treatment and cells treated only with irradiation with no photosensitizer was also carried out. The percentage of cell viability was measured as a percentage ratio of the absorbance of the treated cells relative to that of the untreated controls. The IC<sub>50</sub> values were determined by nonlinear regression analysis. Experiments were performed in triplicate.

### **Cellular uptake**

For time-dependent cellular uptake experiments with the MCF-7 cell line, approximately  $1 \times 10^5$  cells were seeded in 24-well cell culture plates and incubated for 24 h. Sn(IV) complexes (10  $\mu$ M) were added to the cells at regular time intervals (6, 12, 24, 48 h). After the incubation time, the cells were washed three times with PBS, lysed with 30  $\mu$ L of Triton-100X, and solubilized in 70  $\mu$ L of DMSO. The relative cellular uptake was measured by determining the absorbance at 435 nm with an ELISA reader. Control experiments were carried out in the absence of the Sn(IV) complexes.

### **DCF-DA assay**

The intracellular production of reactive oxygen species (ROS) was detected by following a previously reported protocol using 2',7'-dichlorodihydrofluorescein diacetate (DCFDA).<sup>[S2]</sup>

### **Theoretical Calculations**

Geometry optimizations for **SnC** and **SnP** were carried out at the B3LYP/SDD level of theory by using the Gaussian 09 software package.<sup>[S3]</sup>

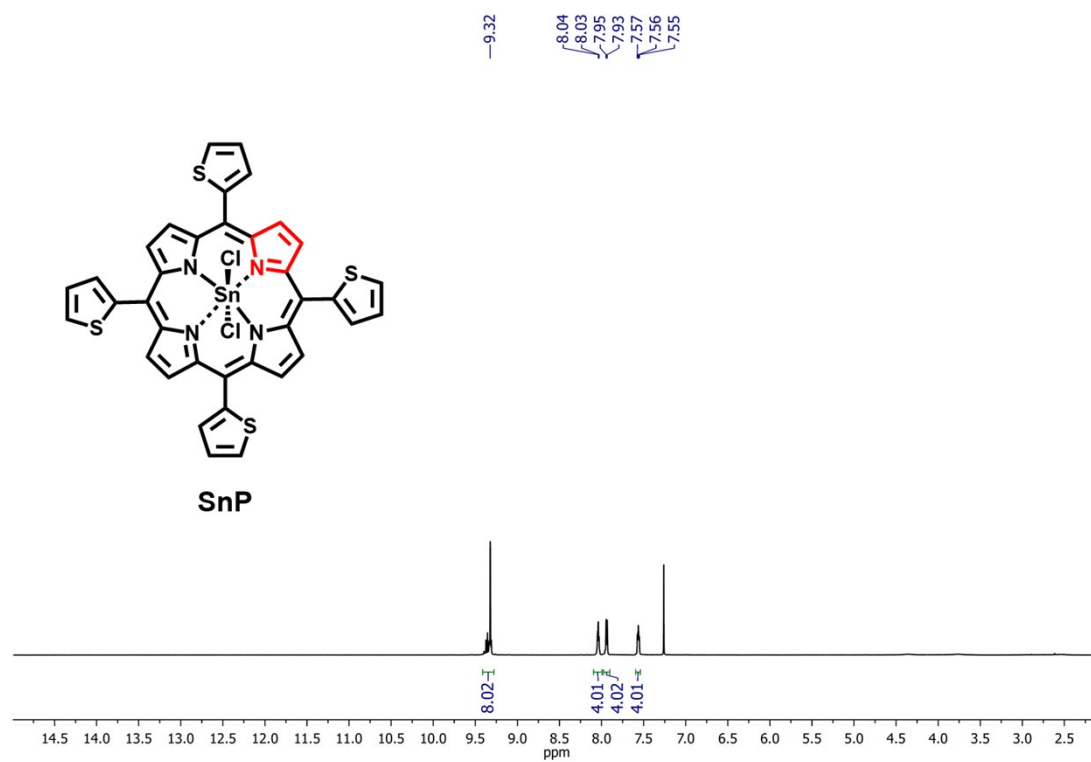

**Figure S1.**  $^1\text{H}$  NMR (400 MHz) spectrum of **SnP** in  $\text{CDCl}_3$ .

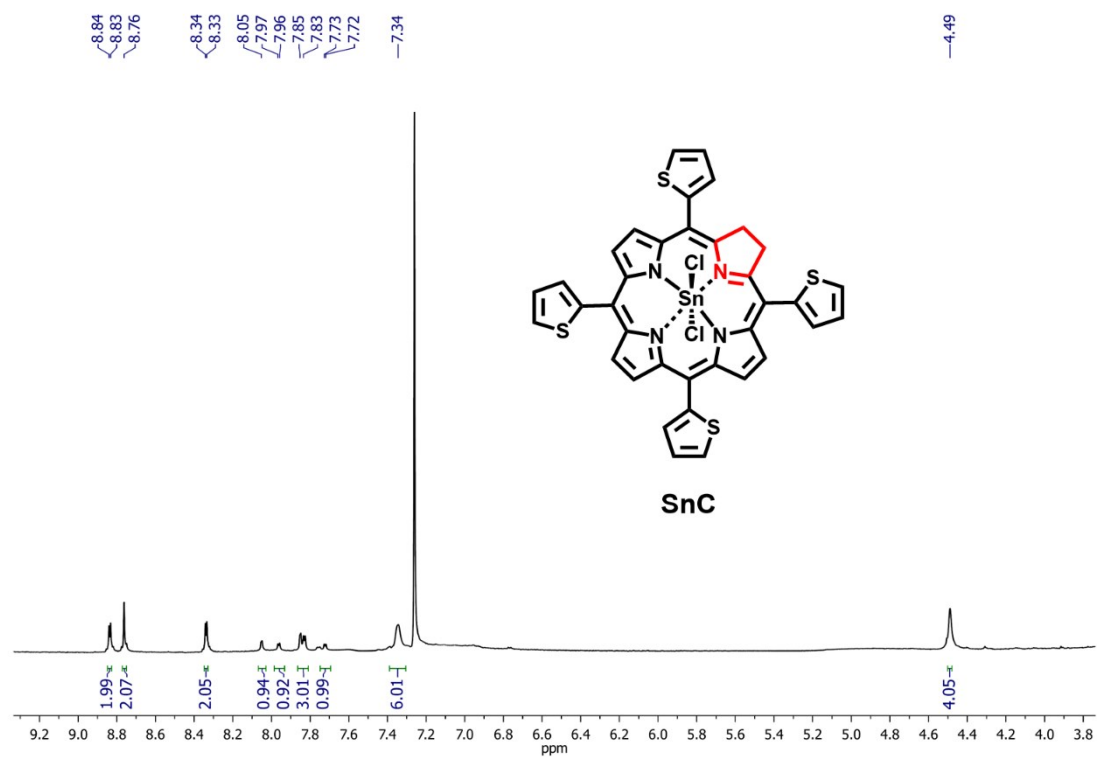

**Figure S2.**  $^1\text{H}$  NMR (400 MHz) spectrum of **SnC** in  $\text{CDCl}_3$ .

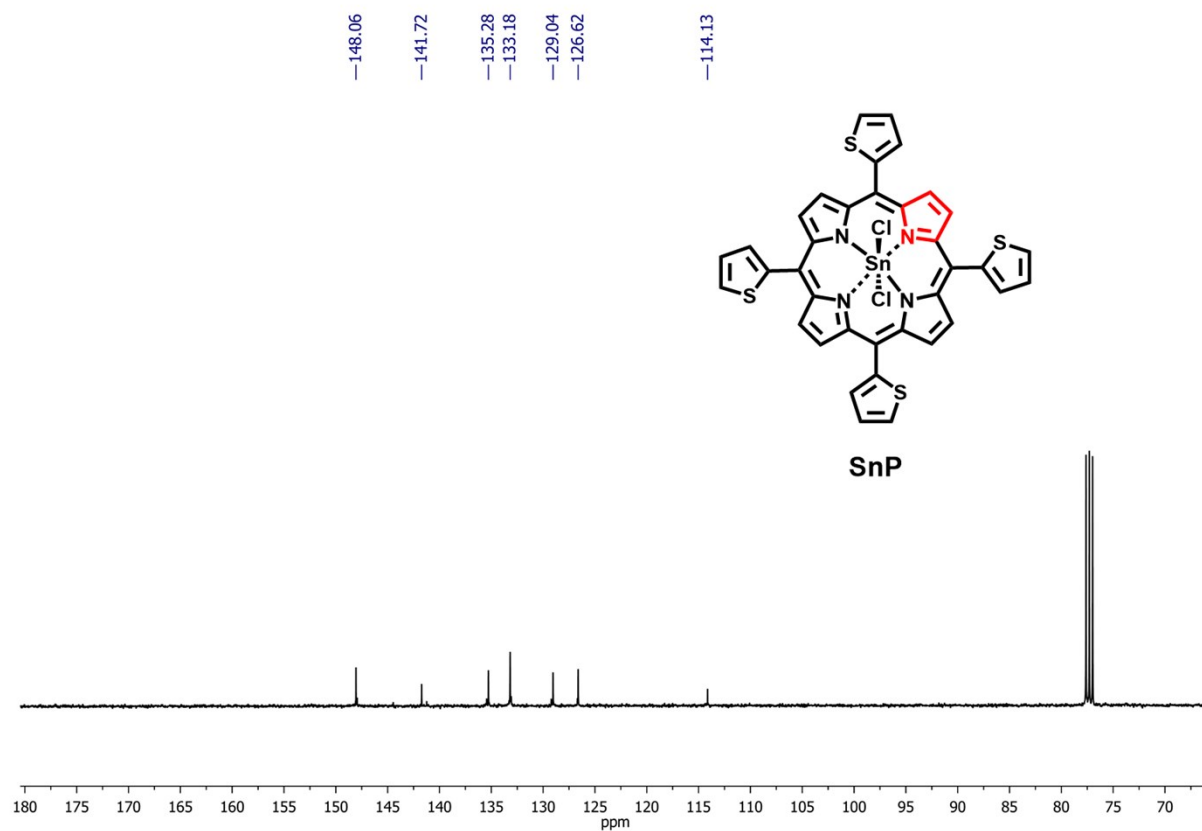

**Figure S3.**  $^{13}\text{C}$  NMR (400 MHz) spectrum of **SnP** in  $\text{CDCl}_3$ .

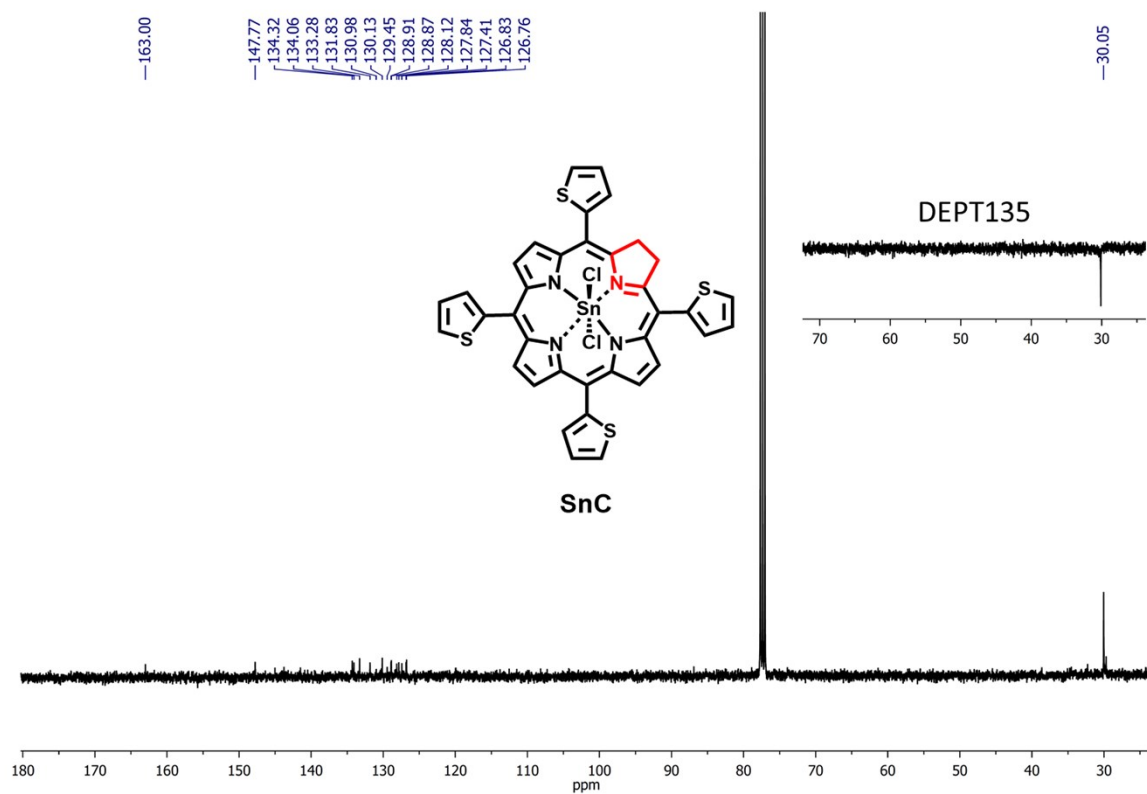

**Figure S4.**  $^{13}\text{C}$  NMR (400 MHz) spectrum of **SnC** in  $\text{CDCl}_3$ . [Inset: partial DEPT135 NMR showing pyrrolic carbon (-CH<sub>2</sub>-CH<sub>2</sub>-) inverse peaks].

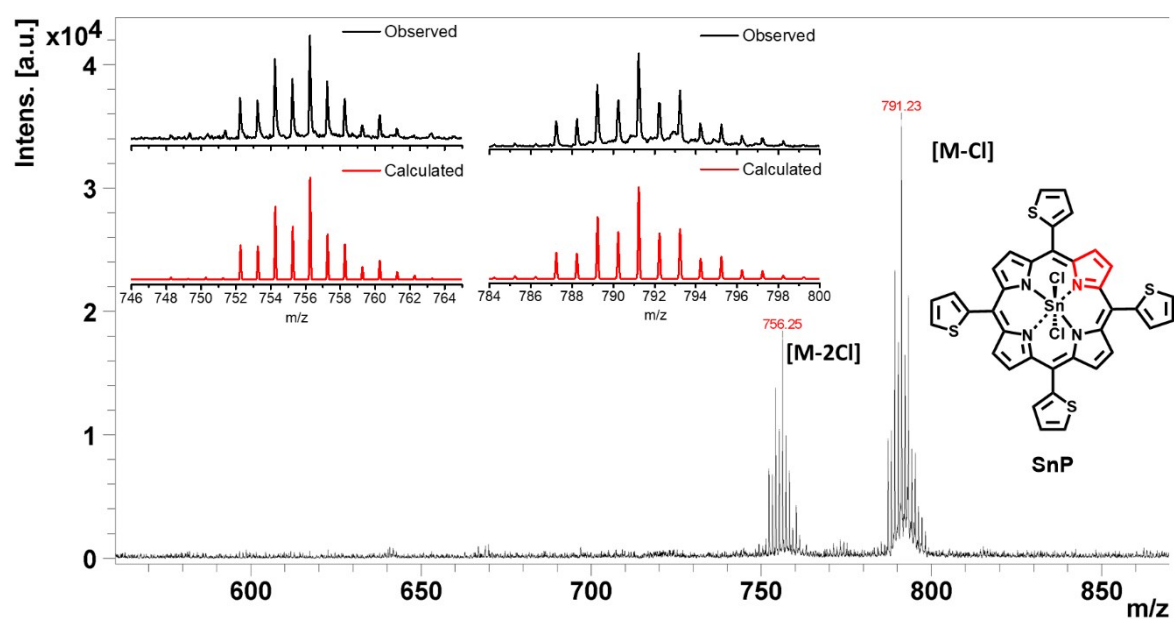

**Figure S5.** MALDI-TOF MS data for **SnP**.



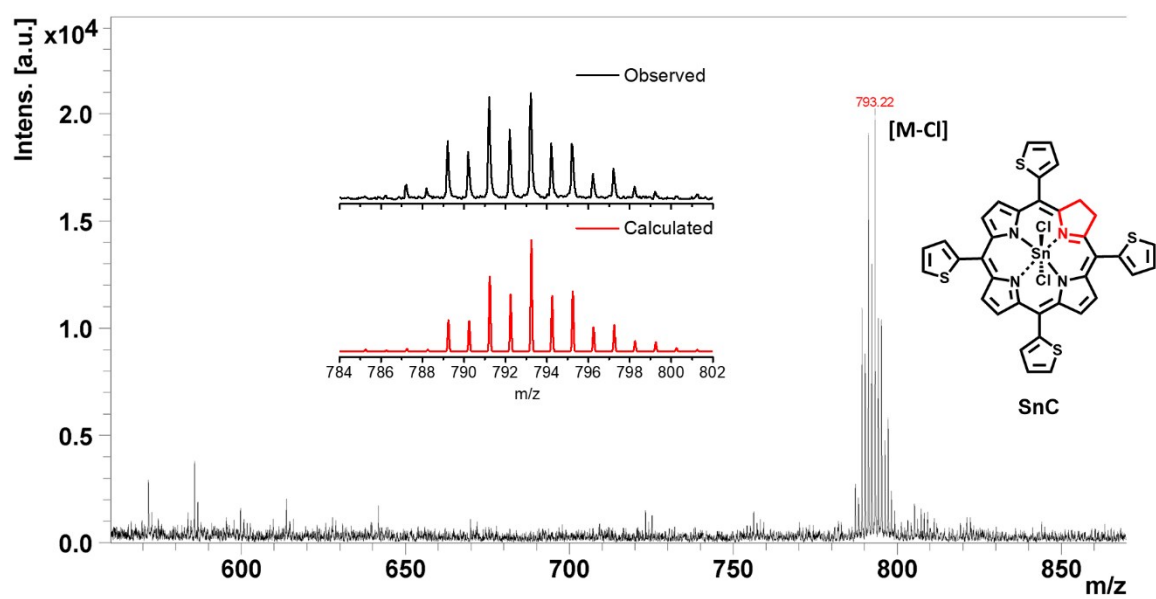

**Figure S6.** MALDI-TOF MS data for SnC.

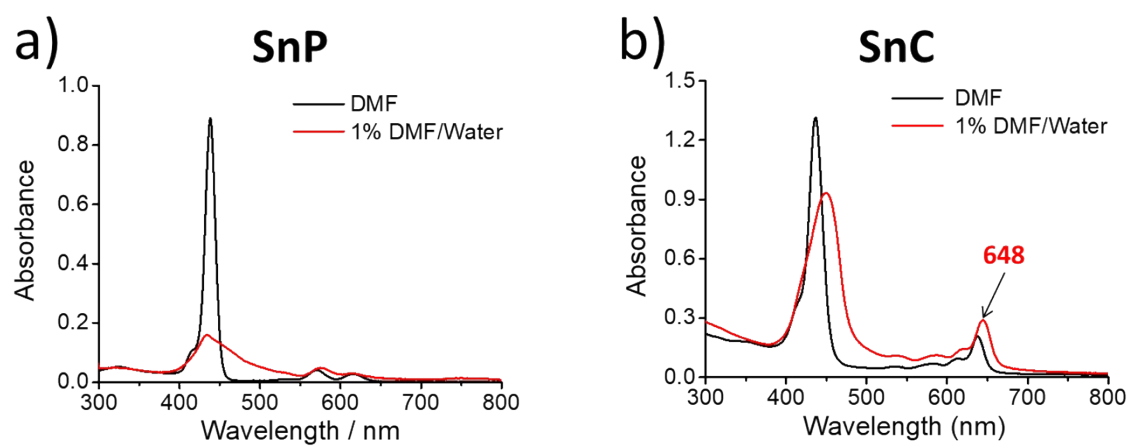

**Figure S7.** Absorbance spectra of (a) **SnP** and (b) **SnC** in DMF and 1% DMF:H<sub>2</sub>O.

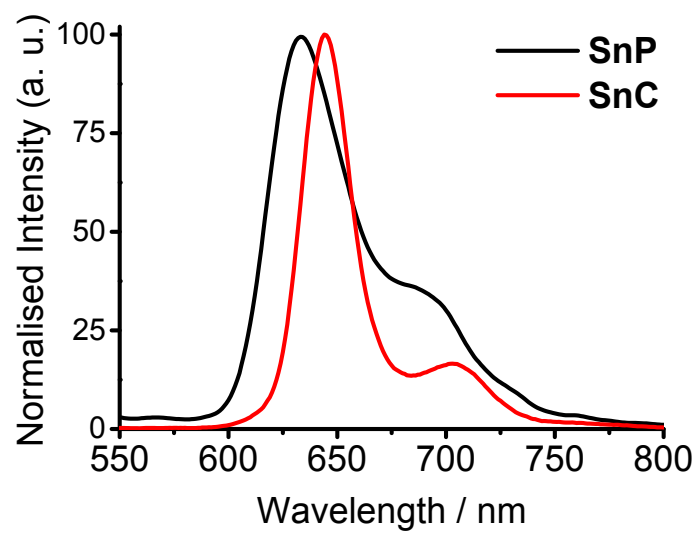

**Figure S8.** Emission spectra of **SnP** (black) and **SnC** (red) in DMF ( $\lambda_{\text{ex}}$  at the B band maximum).

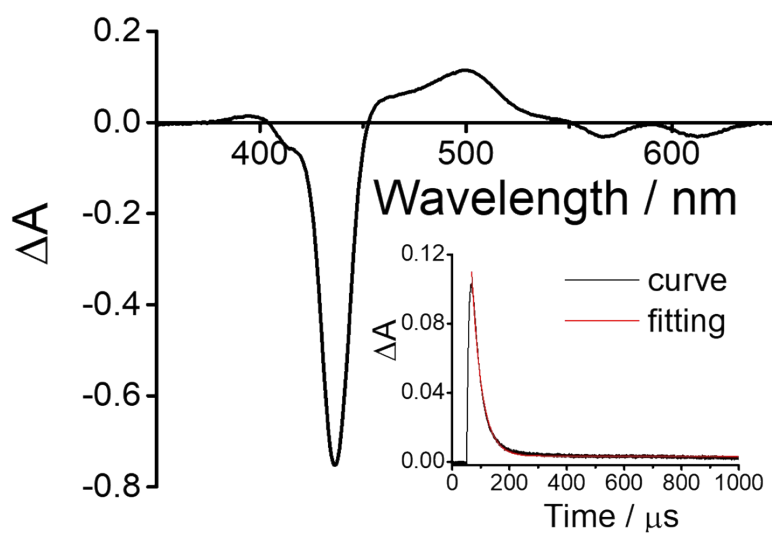

**Figure S9.** Transient absorption spectra for **SnP** excited at the B band maximum in N<sub>2</sub> purged DMF (Inset: triplet absorption decay curve).

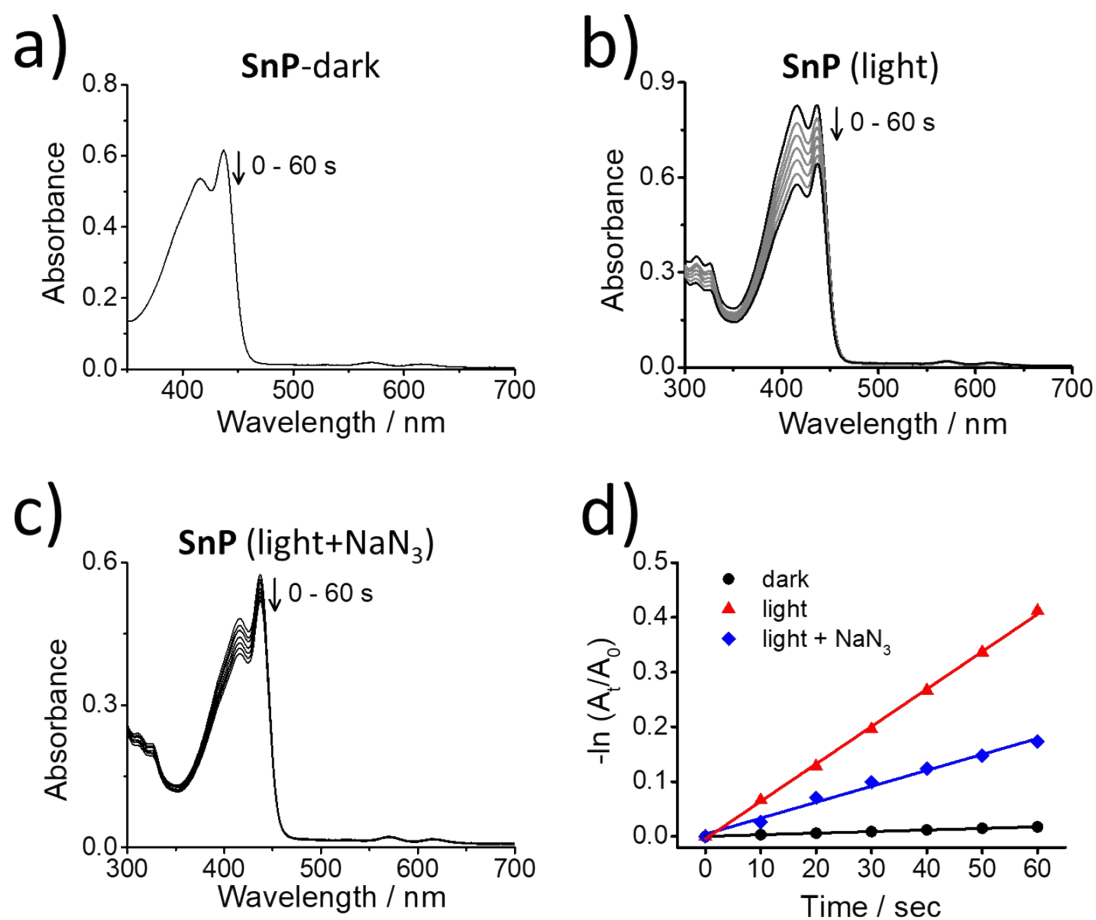

**Figure S10.** Spectral changes of DPBF in the presence of **SnP**, (a) when kept in the dark, (b) when under light irradiation, and (c) when under light irradiation in the presence of NaN<sub>3</sub>; (d) A plot of absorbance change of DPBF at 418 nm vs photoirradiation time in the dark, and under illumination in the presence and absence of NaN<sub>3</sub> in DMF.

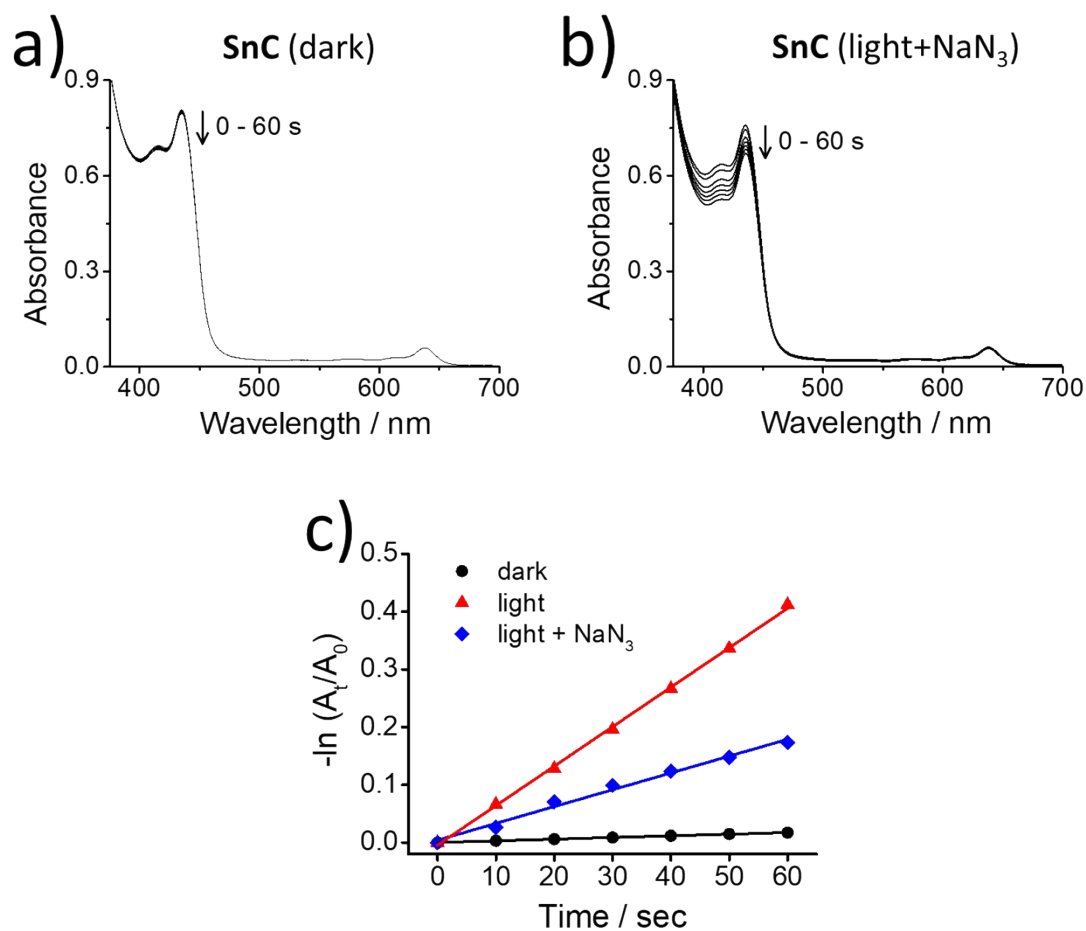

**Figure S11.** Spectral changes of DPBF in the presence of **SnC**, (a) when kept in the dark (dark), and (b) when under light irradiation in the presence of NaN<sub>3</sub>; (c) A plot of the absorbance change of DPBF at 418 nm vs photoirradiation time for **SnC** in the dark, and under illumination in the presence and absence of NaN<sub>3</sub> in DMF.

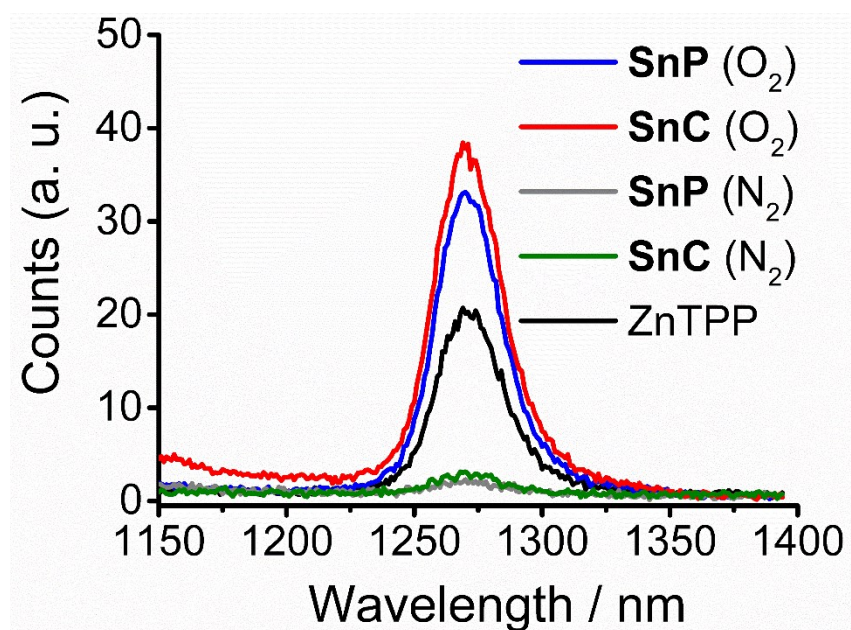

**Figure S12.** Singlet oxygen phosphorescence signals generated by **SnP** and **SnC** in air-saturated and N<sub>2</sub> purged DMF along with that of the ZnTPP standard.

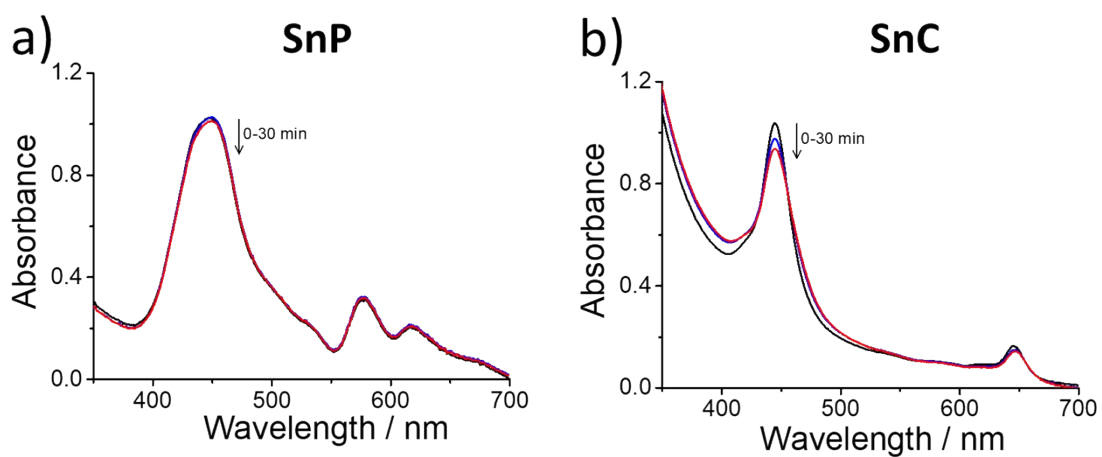

**Figure S13.** Photostability of **SnP** and **SnC** in 1% DMF:H<sub>2</sub>O under irradiation at 660 nm for 30 min with a Thorlabs M660L3 LED under the same conditions used for the *in vitro* cell studies against MCF-7 breast cancer cells.



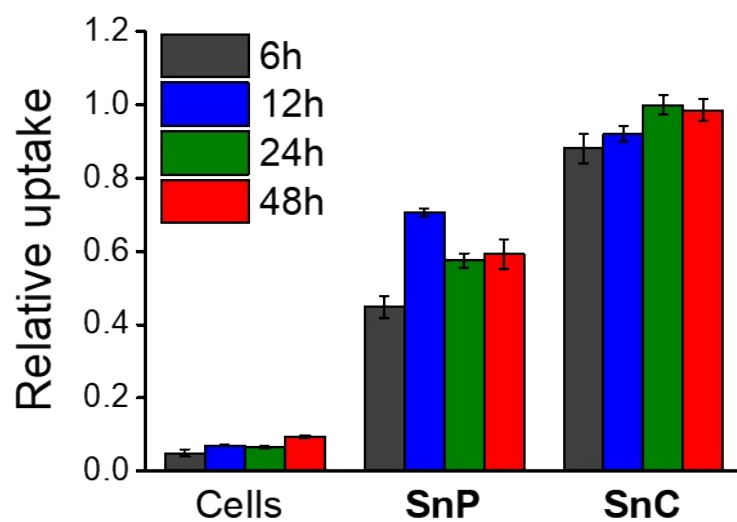

**Figure S14.** Time-dependent relative cellular uptake of **SnP** and **SnC** at 10  $\mu$ M by MCF-7 cells determined by the UV-visible absorption spectroscopy of the lysed cells. Error bars represent the mean standard deviation.

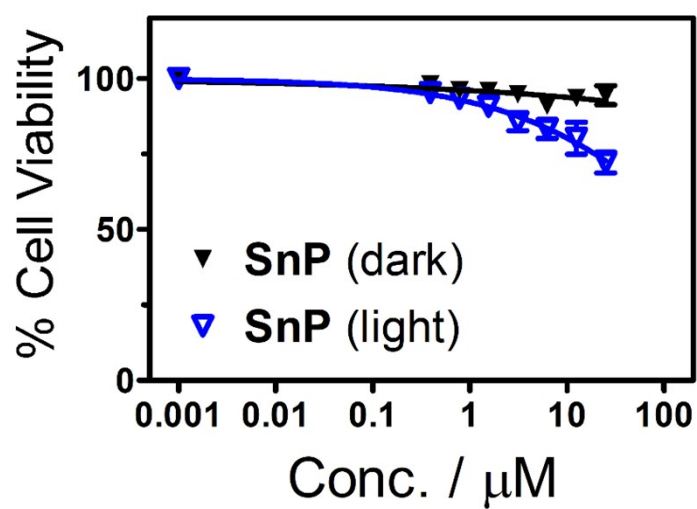

**Figure S15.** MTT-assay cytotoxicity profiles of **SnP** in MCF-7 cells after 24 h incubation in the dark and under photoirradiation for 30 min (red circle) with a 660 nm ( $280 \text{ mW} \cdot \text{cm}^{-2}$ ) LED. Error bars represent the mean standard deviation.

## References

- S1. M. V Berridge, P. M. Herst and A. S. Tan, *Biotechnol. Annu. Rev.*, 2005, **11**, 127–152.
- S2. M. Oparka, J. Walczak, D. Malinska, L.M.P.E. van Oppen, J. Szczepanowska, W.J.H. Koopman, M.R. Wieckowski, *Methods*, 2016, **109**, 3–11.
- S3. M.J. Frisch, G.W. Trucks, H.B. Schlegel, G.E. Scuseria, M.A. Robb, J.R. Cheeseman, G. Scalmani, V. Barone, G. a. Petersson, H. Nakatsuji, X. Li, M. Caricato, A.V. Marenich, J. Bloino, B.G. Janesko, R. Gomperts, B. Mennucci, H.P. Hratchian, J.V. Ortiz, A.F. Izmaylov, J.L. Sonnenberg, Williams, F. Ding, F. Lipparini, F. Egidi, J. Goings, B. Peng, A. Petrone, T. Henderson, D. Ranasinghe, V.G. Zakrzewski, J. Gao, N. Rega, G. Zheng, W. Liang, M. Hada, M. Ehara, K. Toyota, R. Fukuda, J. Hasegawa, M. Ishida, T. Nakajima, Y. Honda, O. Kitao, H. Nakai, T. Vreven, K. Throssell, J.A. Montgomery Jr., J.E. Peralta, F. Ogliaro, M.J. Bearpark, J.J. Heyd, E.N. Brothers, K.N. Kudin, V.N. Staroverov, T.A. Keith, R. Kobayashi, J. Normand, K. Raghavachari, A.P. Rendell, J.C. Burant, S.S. Iyengar, J. Tomasi, M. Cossi, J.M. Millam, M. Klene, C. Adamo, R. Cammi, J.W. Ochterski, R.L. Martin, K. Morokuma, O. Farkas, J.B. Foresman, D.J. Fox, (2009) Gaussian 09, Revision E.01, Gaussian, Inc., Wallingford.
